# Supplementary material
Source: MDPI journal article supplement (https://www.mdpi.com/2075-163X/8/1/3)

# 3D Geological Model Flin Flon mine camp

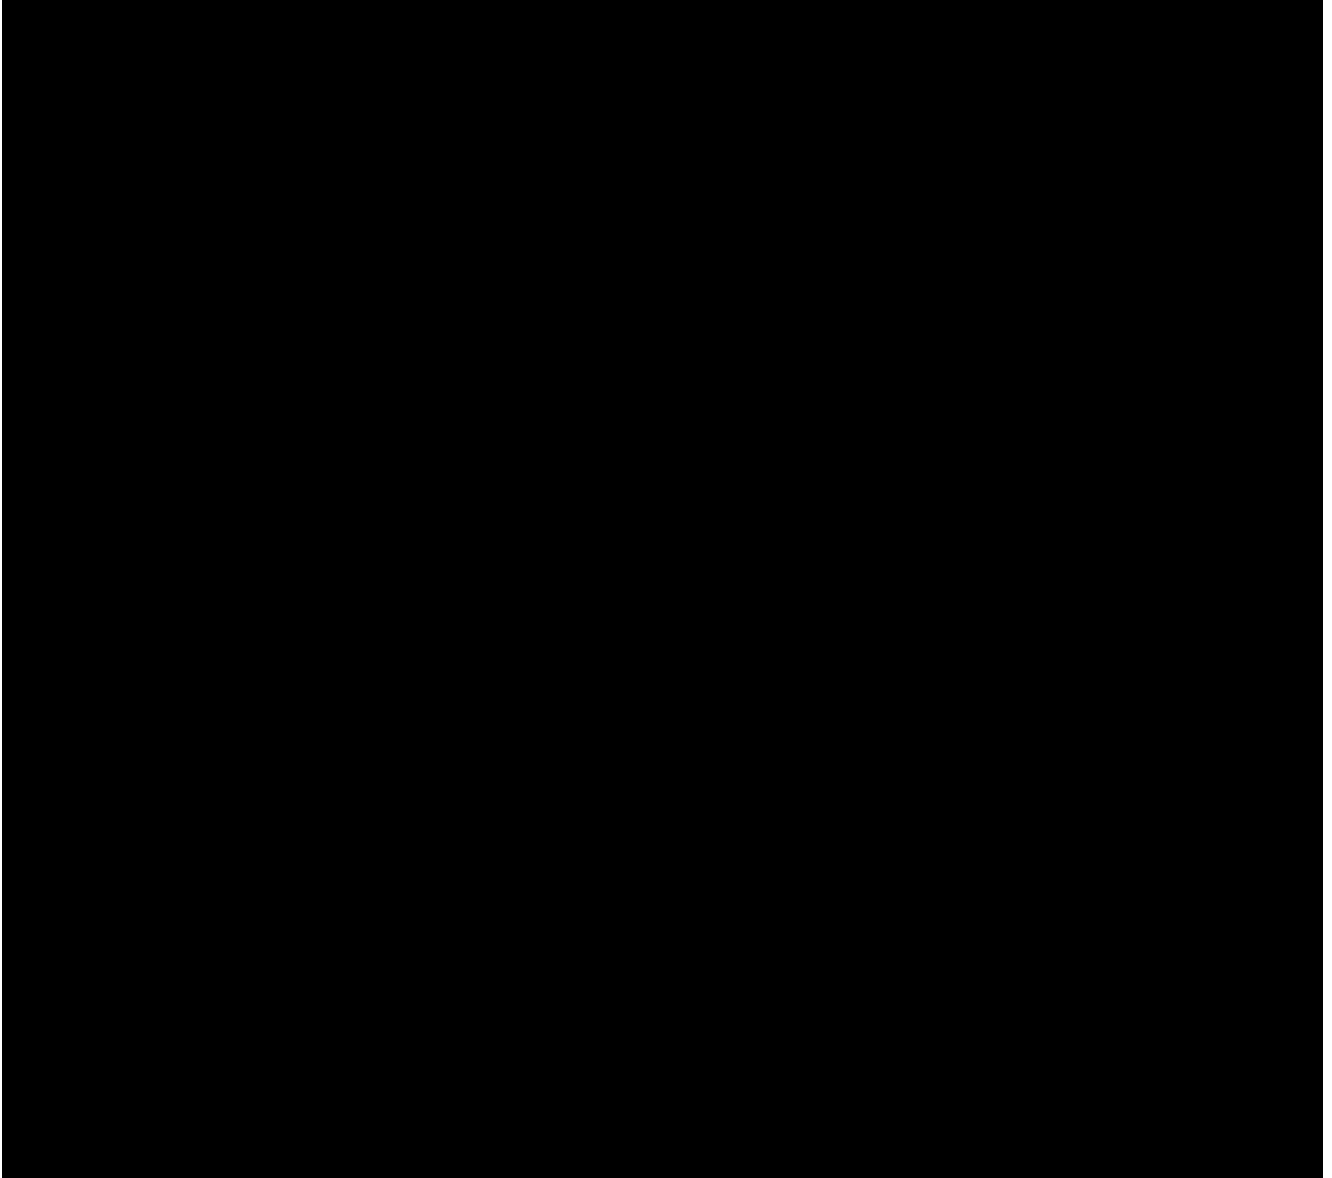

Figure S1

## Legend for PointSet alteration proxies

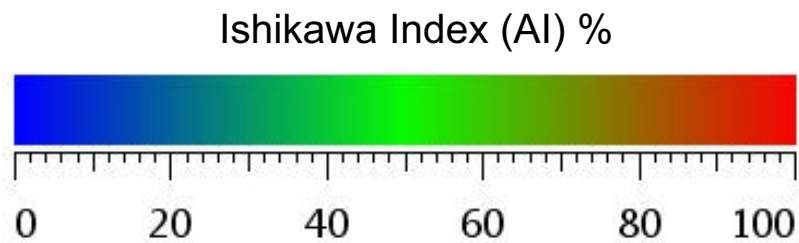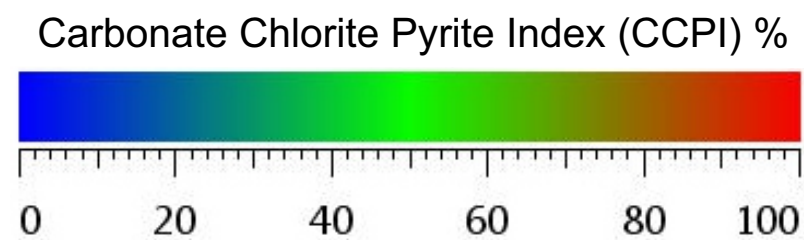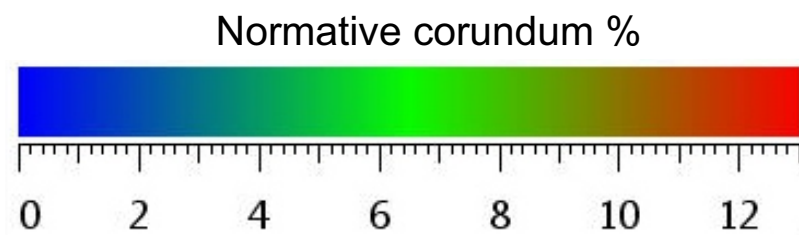

Supplement: s1 [file s1]
